# Supplementary material for: Mental Health Service Users’ Perspectives on Psychiatric Advance Directives: A Systematic Review
Source: Atypon-hosted journal article supplement (doi:10.1176/appi.ps.202200003), 2022-09-21

**Characteristics of included studies**

| Study Number | Reference                   | Country                | Methods                              | Participating service users                                                                                                                                                                                      | PAD inclusion criterion to study?             | Type of PAD                                                        | Quality Rating           |
|--------------|-----------------------------|------------------------|--------------------------------------|------------------------------------------------------------------------------------------------------------------------------------------------------------------------------------------------------------------|-----------------------------------------------|--------------------------------------------------------------------|--------------------------|
| 1            | Ambrosini et al., 2012a (1) | Canada (Quebec)        | Qualitative interviews               | Total n=12<br>Schizophrenia n=5<br>Bipolar n=3<br>Depression n=4                                                                                                                                                 | No, but PAD creation part of study            | Facilitated by lawyer                                              | QUAL 5                   |
| 2            | Ambrosini et al., 2012b (2) | Canada (Quebec)        | Mixed methods                        | Adults with serious mental illness<br><br>Quantitative: Total n=59<br>Schizophrenia n=19<br>Bipolar n=16<br>Depression n=24<br><br>Qualitative: Total n=12<br>Schizophrenia n=5<br>Bipolar n=3<br>Depression n=4 | No, but PAD creation part of study            | Mostly created by service user alone, partly facilitated by lawyer | QUAL 4<br>QUAN 5<br>MM 5 |
| 3            | Amering et al., 2005 (3)    | USA (New York (state)) | Qualitative interviews, focus groups | Adults with extensive experience with mental health services and crisis interventions, including hospitalisation<br>Total n=33                                                                                   | No, but PAD created in the context of study   | Not specified                                                      | QUAL 5                   |
| 4            | Atkinson et al., 2003 (4)   | UK (Scotland)          | Qualitative interviews, focus groups | Total n=6                                                                                                                                                                                                        | No                                            | Not specified                                                      | QUAL 3                   |
| 5            | Backlar et al., 2001 (5)    | USA (Oregon)           | Qualitative interviews               | Severe and persistent mental disorders<br>Total n=40<br>Schizophrenia n=28<br>Other n=12                                                                                                                         | No, but PAD creation offered as part of study | Not specified                                                      | QUAL 2,5                 |
| 6            | Borda and Zuleta, 2020 (6)  | Colombia               | Qualitative interviews               | Substance use disorders<br>n=3                                                                                                                                                                                   | No                                            | Ulysses agreement                                                  | QUAL 4,5                 |

|    |                             |                      |                                         |                                                                                                                            |                                           |                                        |                                |
|----|-----------------------------|----------------------|-----------------------------------------|----------------------------------------------------------------------------------------------------------------------------|-------------------------------------------|----------------------------------------|--------------------------------|
| 7  | Borschmann et al., 2014 (7) | UK (England)         | Qualitative document analysis           | Adults with Borderline Personality Disorder<br>Total n=41                                                                  | Yes, but PAD creation part of prior study | Joint Crisis Plan                      | QUAL 5                         |
| 8  | Buscemi, 2003 (8)           | USA (Missouri)       | Quantitative survey                     | Adults with mental illness, mostly diagnosis of bipolar, depression and schizophrenia<br>Total n=137                       | No                                        | Not specified                          | QUAN 2                         |
| 9  | Easter et al., 2020 (9)     | USA (North Carolina) | RCT                                     | Adults with serious mental illness, diagnosis of schizophrenia, bipolar or other psychotic or mood disorder<br>Total n=145 | No, but PAD creation part of study        | Facilitated by peers or treatment team | QUAN 5                         |
| 10 | Elbogen et al., 2007 (10)   | USA (North Carolina) | Mixed methods                           | Total n=125<br>Schizophrenia or schizoaffective disorder n=76<br>Bipolar or Major depression n=49                          | No, but PAD creation part of study        | Facilitated by researcher              | QUAL 4,5<br>QUAN 4,5<br>MM 1,5 |
| 11 | Farrelly et al., 2015 (11)  | UK (England)         | Qualitative interviews and focus groups | Adults with psychotic disorder, psychiatric admission within the last 2 years, focus on older service users<br>Total n=35  | No, but PAD creation part of study        | Joint Crisis Plan                      | QUAL 5                         |
| 12 | Farrelly et al., 2016 (12)  | UK (England)         | Qualitative interviews and focus groups | Adults with psychotic disorder, psychiatric admission within the last 2 years<br>Total n=51                                | No, but PAD creation part of study        | Joint Crisis Plan                      | QUAL 5                         |
| 13 | Foy et al., 2007 (13)       | UK (Scotland)        | Qualitative survey                      | Adults with severe and enduring mental illness<br>Total n=58                                                               | No                                        | Not specified                          | QUAL 2                         |
| 14 | Gergel et al., 2021 (14)    | UK                   | Qualitative survey                      | Bipolar<br>Total n=565                                                                                                     | No                                        | Ulysses agreement                      | QUAL 5                         |
| 15 | Gowda et al., 2018 (15)     | India                | Quantitative survey                     | Total n=182<br>Schizophrenia n=86<br>Affective disorders n=80<br>Other n=16                                                | No, but PAD creation part of study        | Not specified                          | QUAN 4                         |

|    |                               |                      |                        |                                                                                                                                                                                                                                        |                                    |                           |                              |
|----|-------------------------------|----------------------|------------------------|----------------------------------------------------------------------------------------------------------------------------------------------------------------------------------------------------------------------------------------|------------------------------------|---------------------------|------------------------------|
| 16 | Grätz and Brieger, 2012 (16)  | Germany              | Mixed methods          | Total n=36<br>Schizophrenia n=8<br>Schizoaffective disorder n=17<br>Affective disorder n=8<br>Neurotic or anxiety disorder n=2<br>Personality disorder n=6                                                                             | Yes                                | Joint Crisis Plan         | QUAL 2<br>QUAN 3,5<br>MM 1,5 |
| 17 | Henderson et al., 2009 (17)   | UK (England)         | RCT                    | Adults with psychotic illness or Bipolar<br>Total n=160                                                                                                                                                                                | No, but PAD creation part of study | Joint Crisis Plan         | QUAN 3,5                     |
| 18 | Hindley et al., 2019 (18)     | UK                   | Quantitative survey    | Bipolar<br>Total n=932                                                                                                                                                                                                                 | No                                 | Not specified             | QUAN 4                       |
| 19 | Hiu et al., 2020 (19)         | Singapore            | Qualitative interviews | Psychotic related disorders<br>Total n=28                                                                                                                                                                                              | No                                 | Not specified             | QUAL 5                       |
| 20 | Hotzy et al., 2020 (20)       | Switzerland          | Mixed Methods          | Psychiatric disorder, ongoing treatment<br>Total n=110                                                                                                                                                                                 | No                                 | Not specified             | QUAL 1<br>QUAN 2,5<br>MM 1,5 |
| 21 | Kim et al., 2007 (21)         | USA (North Carolina) | Qualitative interviews | Severe mental illness<br>Total n=28                                                                                                                                                                                                    | No, but PAD creation part of study | Facilitated by researcher | QUAL 5                       |
| 22 | Lenagh-Glue et al., 2018 (22) | New Zealand          | Quantitative survey    | Total n=23                                                                                                                                                                                                                             | No                                 | Not specified             | QUANT 3                      |
| 23 | Lequin et al., 2021 (23)      | Switzerland          | Mixed methods          | Documents (quan. and qual.):<br>Total n=184<br>Substance use disorder n=83<br>Psychosis n=66<br>Mood disorder n=28<br>Other n=7<br><br>Interviews (qual. and quan.):<br>Total n=12<br>Mood disorders n=4<br>Psychosis n=3<br>Other n=4 | Yes                                | Joint Crisis Plan         | QUAL 5<br>QUAN 3<br>MM 2,5   |

|    |                                |                        |                                |                                                                                                                         |                                    |                                                                        |                              |
|----|--------------------------------|------------------------|--------------------------------|-------------------------------------------------------------------------------------------------------------------------|------------------------------------|------------------------------------------------------------------------|------------------------------|
| 24 | Morriss et al., 2020 (24)      | UK (England and Wales) | Mixed methods                  | Bipolar<br>Quantitative survey: Total n=544<br>Qualitative interviews: Total n=18                                       | No                                 | Not specified                                                          | QUAL 5<br>QUAN 3,5<br>MM 2,5 |
| 25 | Morrissey, 2015 (25)           | Ireland                | Mixed methods                  | Total n=111                                                                                                             | No                                 | Not specified                                                          | QUAL 3<br>QUAN 4,5<br>MM 4,5 |
| 26 | O'Connell and Stein, 2005 (26) | USA (Ohio)             | Mixed methods                  | Total n=32                                                                                                              | No                                 | Not specified                                                          | QUAL 4,5<br>QUAN 3<br>MM 2   |
| 27 | O'Donoghue et al., 2010 (27)   | Ireland                | Quantitative survey            | Total n=67<br>Schizophrenia/Schizoaffective disorder n=38<br>Affective disorders n=24<br>Other n=5                      | No                                 | Not specified                                                          | QUAN 4,5                     |
| 28 | Papageorgiou et al., 2004 (28) | UK (England)           | Quantitative document analysis | In-patients due to discharge from involuntary treatment<br>Documents:<br>Total n=79<br><br>Questionnaire:<br>Total n=59 | No, but PAD creation part of study | Mostly created by service user alone, partly facilitated by researcher | QUAN 5                       |
| 29 | Papageorgiou et al., 2002 (29) | UK (England)           | RCT                            | In-patients due to discharge from involuntary treatment<br>Total n=59                                                   | No, but PAD creation part of study | Mostly created by service user alone, partly facilitated by researcher | QUAN 4,5                     |
| 30 | Peto et al., 2004 (30)         | USA (Washington)       | Quantitative survey            | Total n=106<br>Schizophrenia n=55<br>Bipolar n=28<br>Depression n=27                                                    | No, but PAD creation part of study | Facilitated by peers and researchers                                   | QUAN 4,5                     |

|    |                               |                      |                                                |                                                                                                                                                                                   |                                    |                                                |                              |
|----|-------------------------------|----------------------|------------------------------------------------|-----------------------------------------------------------------------------------------------------------------------------------------------------------------------------------|------------------------------------|------------------------------------------------|------------------------------|
| 31 | Quinlivan et al., 2019 (31)   | UK (England)         | Qualitative focus groups                       | Lived experience with mental illness, self-harm and/or psychiatric services<br>Total n=13                                                                                         | No                                 | Not specified                                  | QUAL 5                       |
| 32 | Scheyett, 2008 (32)           | USA (North Carolina) | RCT                                            | Schizophrenia, schizoaffective disorder, other psychotic disorder, or major mood disorder with psychotic features<br>Total n=469<br>[same data as Swanson et al., 2006b]          | No, but PAD creation part of study | Facilitated by researcher                      | QUAN 3,5                     |
| 33 | Scheyett and Rooks, 2012 (33) | USA (South Carolina) | Mixed methods                                  | Students with severe mental illness<br>Total n=40                                                                                                                                 | No                                 | Not specified                                  | QUAL 5<br>QUAN 3<br>MM 3     |
| 34 | Shields et al., 2013 (34)     | India                | Qualitative interviews                         | Severe mental illness<br>Total n=39                                                                                                                                               | No, but PAD creation part of study | Facilitated by external person (health worker) | QUAL 5                       |
| 35 | Srebnik et al., 2003 (35)     | USA (Washington)     | Mixed methods                                  | Total n=303<br>Schizophrenia n=155<br>Bipolar n=77<br>Depression n=61<br>Other n=10                                                                                               | No                                 | Not specified                                  | QUAL 3,5<br>QUAN 4,5<br>MM 2 |
| 36 | Srebnik et al., 2005 (36)     | USA (Washington)     | Quantitative and qualitative document analysis | Psychiatric outpatients with at least two major psychiatric crises within the last two years<br>Total n=106<br>Schizophrenia n=47<br>Bipolar n=28<br>Depression n=23<br>Other n=8 | No, but PAD creation part of study | Not specified                                  | QUAL 3,5<br>QUAN 4<br>MM 2,5 |
| 37 | Stephenson et al., 2020 (37)  | UK                   | Qualitative focus groups                       | Bipolar<br>Total n=10                                                                                                                                                             | No, but PAD creation part of study | Prototype PAD template developed               | QUAL 5                       |

|    |                               |                      |                          |                                                                                                                                  |                                               |                                   |                            |
|----|-------------------------------|----------------------|--------------------------|----------------------------------------------------------------------------------------------------------------------------------|-----------------------------------------------|-----------------------------------|----------------------------|
|    |                               |                      |                          |                                                                                                                                  |                                               | (similar to JCP)                  |                            |
| 38 | Sutherby et al., 1999 (38)    | UK (England)         | Mixed methods            | Psychotic and/or bipolar disorder<br>Total n=40                                                                                  | No, but PAD creation offered as part of study | Facilitated by researcher         | QUAL 2,5<br>QUAN 4<br>MM 2 |
| 39 | Swanson et al., 2006a (39)    | USA                  | Quantitative survey      | Schizophrenia, depression and bipolar<br>Total n=1011                                                                            | No                                            | Not specified                     | QUAN 5                     |
| 40 | Swanson et al., 2006b (40)    | USA (North Carolina) | RCT                      | Schizophrenia, schizoaffective disorder, other psychotic disorder, or major mood disorder with psychotic features<br>Total n=469 | No, but PAD creation part of study            | Facilitated by researcher         | QUAN 3,5                   |
| 41 | Swanson et al., 2003 (41)     | USA (North Carolina) | Quantitative survey      | Schizophrenia and related disorders<br>Total n=104                                                                               | No                                            | Not specified                     | QUAN 2                     |
| 42 | Tekkalaki et al., 2018 (42)   | India                | Quantitative survey      | Total n=50<br>Schizophrenia n=30<br>Bipolar n=20                                                                                 | No                                            | Not specified                     | QUAN 3,5                   |
| 43 | Thom et al., 2019 (43)        | New Zealand          | Qualitative focus groups | Total n=25                                                                                                                       | No                                            | Not specified                     | QUAL 5                     |
| 44 | Thom et al., 2015 (44)        | New Zealand          | Quantitative survey      | Total n=110                                                                                                                      | No                                            | Not specified                     | QUAN 3,5                   |
| 45 | Thornicroft et al., 2013 (45) | UK (England)         | RCT                      | Relapsing psychotic illness, aged over 16<br>Total n=569                                                                         | No, but PAD creation part of study            | Joint Crisis Plan                 | QUAN 5                     |
| 46 | Valentine et al., 2021 (46)   | Australia            | Qualitative interviews   | First episode psychosis (young people)<br>Total n=12                                                                             | No                                            | Not specified                     | QUAL 5                     |
| 47 | Van der Ham et al., 2013 (47) | Netherlands          | Qualitative interviews   | Total n=4                                                                                                                        | Yes                                           | Crisis Card                       | QUAL 3,5                   |
| 48 | Van Dorn et al., 2008 (48)    | USA (North Carolina) | RCT                      | Schizophrenia, Bipolar, Depression with psychotic features<br>Total n=469                                                        | No, but PAD creation part of study            | Facilitated by research assistant | QUAN 2                     |
| 49 | Van Dorn et al., 2009 (49)    | USA (Florida)        | Quantitative interview   | Total n=85<br>Schizophrenia n=28                                                                                                 | No                                            | Not specified                     | QUAN 4,5                   |

| Bipolar or depression n=57 |                            |                |                          |                                                                                        |                                    |                          |                            |
|----------------------------|----------------------------|----------------|--------------------------|----------------------------------------------------------------------------------------|------------------------------------|--------------------------|----------------------------|
| 50                         | Varekamp, 2004 (50)        | Netherlands    | Qualitative interviews   | Total n=18<br>Schizophrenia n=6<br>Bipolar n=11<br>Borderline personality disorder n=1 | Partly (1/3 of participants)       | Ulysses agreement        | QUAL 5                     |
| 51                         | Wauchope et al., 2011 (51) | Australia      | Mixed methods            | Serious mental illness<br>Total n=33                                                   | No, but PAD creation part of study | Facilitated by clinician | QUAL 3<br>QUAN 3,5<br>MM 3 |
| 52                         | Wilder et al., 2013 (52)   | USA (Virginia) | Quantitative survey      | Total n=40                                                                             | No                                 | Not specified            | QUAN 3                     |
| 53                         | Williams et al., 2014 (53) | Australia      | Qualitative focus groups | Not specified                                                                          | No, but PAD creation part of study | Joint Crisis Plan        | QUAL 3                     |

## References

1. Ambrosini DL, Bemme D, Crocker AG, et al.: Narratives of individuals concerning psychiatric advance directives: Qualitative study. *Journal of Ethics in Mental Health* 6:1-9, 2012
2. Ambrosini DL, Crocker G A, Latimer E: Preferences for instructional or proxy advance directives in mental health: an exploratory mixed methods study. *Journal of Ethics in Mental Health* 6:1-19, 2012
3. Amering M, Stastny P, Hopper K: Psychiatric advance directives: qualitative study of informed deliberations by mental health service users. *The British Journal of Psychiatry* 186:247-52, 2005
4. Atkinson JM, Garner HC, Stuart S, et al.: The development of potential models of advance directives in mental health care. *Journal of Mental Health* 12:575-84, 2003
5. Backlar P, McFarland BH, Swanson JW, et al.: Consumer, provider, and informal caregiver opinions on psychiatric advance directives. *Administration and Policy in Mental Health* 28:427-41, 2001
6. Borda JP, Zuleta P: Ulysses Coercion through Psychiatric Advanced Directives in Homeless People with Substance Use Disorder: A Qualitative Study of the Colombian Perspective. *Addict Disord Treat*, 2020
7. Borschmann R, Trevillion K, Henderson RC, et al.: Advance statements for borderline personality disorder: a qualitative study of future crisis treatment preferences. *Psychiatric Services* 65:802-7, 2014
8. Buscemi BAH: The theory of planned behavior and the health belief model applied to mental health consumers' attitudes toward advance directives applying to psychiatric care: ProQuest Information and Learning, 2003
9. Easter MM, Swanson JW, Robertson AG, et al.: Impact of psychiatric advance directive facilitation on mental health consumers: empowerment, treatment attitudes and the role of peer support specialists. *Journal of Mental Health*, 2020

10. Elbogen EB, Swanson JW, Swartz MS, et al.: Effectively implementing psychiatric advance directives to promote self-determination of treatment among people with mental illness. *Psychology Public Policy and Law* 13:273-88, 2007
11. Farrelly S, Lester H, Rose D, et al.: Improving Therapeutic Relationships: Joint Crisis Planning for Individuals With Psychotic Disorders. *Qualitative Health Research* 25:1637-47, 2015
12. Farrelly S, Lester H, Rose D, et al.: Barriers to shared decision making in mental health care: qualitative study of the Joint Crisis Plan for psychosis. *Health Expectations* 19:448-58, 2016
13. Foy J, MacRae A, Thorn A, et al.: Advance statements: Survey of patients' views and understanding. *Psychiatric Bulletin* 31:339-41, 2007
14. Gergel T, Das P, Owen G, et al.: Reasons for endorsing or rejecting self-binding directives in bipolar disorder: a qualitative study of survey responses from UK service users. *Lancet Psychiatry* 8:599-609, 2021
15. Gowda GS, Noorthoorn EO, Lepping P, et al.: Factors influencing advance directives among psychiatric inpatients in India. *International Journal of Law and Psychiatry* 56:17-26, 2018
16. Grätz J, Brieger P: Implementation of joint-crisis plans - A study of health care users and professionals. [German]. *Psychiatrische Praxis* 39:388-93, 2012
17. Henderson C, Flood C, Leese M, et al.: Views of service users and providers on joint crisis plans: single blind randomized controlled trial. *Social Psychiatry and Psychiatric Epidemiology* 44:369-76, 2009
18. Hindley G, Stephenson LA, Ruck Keene A, et al.: "Why have I not been told about this?": a survey of experiences of and attitudes to advance decision-making amongst people with bipolar. *Wellcome Open Research* 4:16, 2019
19. Hiu S, Su A, Ong S, et al.: Stakeholder perspective on barrier to the implementation of Advance Care Planning in a traditionally paternalistic healthcare system. *PLoS One* 15:e0242085, 2020
20. Hotzy F, Cattapan K, Orosz A, et al.: Psychiatric advance directives in Switzerland: Knowledge and attitudes in patients compared to professionals and usage in clinical practice. *International Journal of Law and Psychiatry* 68:N.PAG-N.PAG, 2020
21. Kim MM, Van Dorn RA, Scheyett AM, et al.: Understanding the personal and clinical utility of psychiatric advance directives: a qualitative perspective. *Psychiatry: Interpersonal and Biological Processes* 70:19-29, 2007
22. Lenagh-Glue J, O'Brien A, Dawson J, et al.: A MAP to mental health: The process of creating a collaborative advance preferences instrument. *New Zealand Med J* 131:18-26, 2018
23. Lequin P, Ferrari P, Suter C, et al.: The Joint Crisis Plan: A Powerful Tool to Promote Mental Health. *Front Psychiatry* 12:621436, 2021
24. Morriss R, Mudigonda M, Bartlett P, et al.: National survey and analysis of barriers to the utilisation of the 2005 mental capacity act by people with bipolar disorder in England and Wales. *Journal of Mental Health* 29:131-8, 2020
25. Morrissey FE: The introduction of a legal framework for advance directives in the UN CRPD era: The views of Irish service users and consultant psychiatrists. *Ethics Med Public Health* 1:325-38, 2015
26. O'Connell MJ, Stein CH: Psychiatric advance directives: perspectives of community stakeholders. *Administration and Policy in Mental Health* 32:241-65, 2005
27. O'Donoghue B, Lyne J, Hill M, et al.: Patient attitudes towards compulsory community treatment orders and advance directives. *Irish Journal of Psychological Medicine* 27:66-71, 2010
28. Papageorgiou A, Janmohamed A, King M, et al.: Advance directives for patients compulsorily admitted to hospital with serious mental disorders: directive content and feedback from patients and professionals. *Journal of Mental Health* 13:379-88, 2004



29. Papageorgiou A, King M, Janmohamed A, et al.: Advance directives for patients compulsorily admitted to hospital with serious mental illness: Randomised control trial. *The British Journal of Psychiatry* 181:513-9, 2002
30. Peto T, Srebnik D, Zick E, et al.: Support needed to create psychiatric advance directives. *Administration and Policy in Mental Health* 31:409-19, 2004
31. Quinlivan L, Nowland R, Steeg S, et al.: Advance decisions to refuse treatment and suicidal behaviour in emergency care: 'it's very much a step into the unknown'. *Bjpsych Open* 5, 2019
32. Scheyett AM: Clinician impact on consumer decisions regarding psychiatric advance directives: ProQuest Information & Learning, 2008
33. Scheyett AM, Rooks A: University Students' Views on the Utility of Psychiatric Advance Directives. *Journal of American College Health* 60:90-3, 2012
34. Shields LS, Pathare S, van Zelst SDM, et al.: Unpacking the psychiatric advance directive in low-resource settings: an exploratory qualitative study in Tamil Nadu, India. *International Journal of Mental Health Systems* 7, 2013
35. Srebnik DS, Russo J, Sage J, et al.: Interest in psychiatric advance directives among high users of crisis services and hospitalization. *Psychiatric services (Washington, DC)* 54:981-6, 2003
36. Srebnik DS, Rutherford LT, Peto T, et al.: The content and clinical utility of psychiatric advance directives. *Psychiatric Services* 56:592-8, 2005
37. Stephenson LA, Gergel T, Ruck Keene A, et al.: The PACT advance decision-making template: preparing for Mental Health Act reforms with co-production, focus groups and consultation. *International Journal of Law and Psychiatry* 71:N.PAG-N.PAG, 2020
38. Sutherby K, Szmukler GI, Halpern A, et al.: A study of 'crisis cards' in a community psychiatric service. *Acta Psychiatrica Scandinavica* 100:56-61, 1999
39. Swanson J, Swartz M, Ferron J, et al.: Psychiatric advance directives among public mental health consumers in five U.S. cities: prevalence, demand, and correlates. *Journal of the American Academy of Psychiatry and the Law* 34:43-57, 2006
40. Swanson JW, Swartz MS, Elbogen EB, et al.: Facilitated psychiatric advance directives: a randomized trial of an intervention to foster advance treatment planning among persons with severe mental illness. *American Journal of Psychiatry* 163:1943-51, 2006
41. Swanson JW, Swartz MS, Hannon MJ, et al.: Psychiatric advance directives: A survey of persons with schizophrenia, family members, and treatment providers. *Int J Forensic Ment Health* 2:73-86, 2003
42. Tekkalaki B, Patil VY, Patil S, et al.: How do Our Patients Respond to the Concept of Psychiatric Advance Directives? An Exploratory Study From India. *Indian Journal of Psychological Medicine* 40:305-9, 2018
43. Thom K, Lenagh-Glue J, O'Brien AJ, et al.: Service user, whānau and peer support workers' perceptions of advance directives for mental health. *International Journal of Mental Health Nursing* 28:1296-305, 2019
44. Thom K, O'Brien AJ, Tellez JJ: Service user and clinical perspectives of psychiatric advance directives in New Zealand. *International Journal of Mental Health Nursing* 24:554-60, 2015
45. Thornicroft G, Farrelly S, Szmukler G, et al.: Clinical outcomes of Joint Crisis Plans to reduce compulsory treatment for people with psychosis: a randomised controlled trial. *Lancet* 381 North American Edition:1634-41, 2013
46. Valentine L, Grace D, Pryor I, et al.: "When I'm Thinking Straight, I Can Put Things in Place for When I'm Not." Exploring the Use of Advance Statements in First-Episode Psychosis Treatment: Young People, Clinician, and Carer Perspectives. *Community Ment Health J* 57:18-28, 2021
47. van der Ham AJ, Voskes Y, van Kempen N, et al.: The implementation of psychiatric advance directives: Experiences from a Dutch crisis card initiative. *Psychiatric Rehabilitation Journal* 36:119-21, 2013
48. Van Dorn RA, Swanson JW, Swartz MS, et al.: Reducing barriers to completing psychiatric advance directives. *Administration and Policy in Mental Health* 35:440-8, 2008

49. Van Dorn RA, Swanson JW, Swartz MS, et al.: Preferences for psychiatric advance directives among Latinos: views on advance care planning for mental health. *Psychiatric Services* 60:1383-5, 2009
50. Varekamp I: Ulysses directives in The Netherlands: opinions of psychiatrists and clients. *Health Policy* 70:291-301, 2004
51. Wauchope B, O'Kearney R, Bone L, et al.: Advance agreements for mental health care: an examination of process and outcomes. *Australian and New Zealand Journal of Psychiatry* 45:281-8, 2011
52. Wilder CM, Swanson JW, Bonnie RJ, et al.: A survey of stakeholder knowledge, experience, and opinions of advance directives for mental health in Virginia. *Administration and Policy in Mental Health* 40:232-9, 2013
53. Williams TM, Smith GP, Lumbus AM: Evaluating the introduction of joint crisis plans into routine clinical practice in four community mental health services. *Australasian Psychiatry* 22:476-80, 2014

### **PubMed Search String**

The following search strategy was used for PubMed:

("advance directive\*[Title/Abstract] OR "advance agreement\*[Title/Abstract] OR "advance care plan\*[Title/Abstract] OR "advance decision\*[Title/Abstract] OR "advance statement\*[Title/Abstract] OR "psychiatric will\*[Title/Abstract] OR "Ulysses contract\*[Title/Abstract] OR "Ulysses agreement\*[Title/Abstract] OR "Mill's Will\*[Title/Abstract] OR "voluntary commitment contract\*[Title/Abstract] OR "nexum contract\*[Title/Abstract] OR "crisis plan\*[Title/Abstract] OR "self-binding"[Title/Abstract]) AND ("mental disorder\*[Title/Abstract] OR "mental health"[Title/Abstract] OR "mental illness"[Title/Abstract] OR "psychiatr\*[Title/Abstract])

### Preferred Reporting Items for Systematic Reviews and Meta-Analyses (PRISMA) diagram

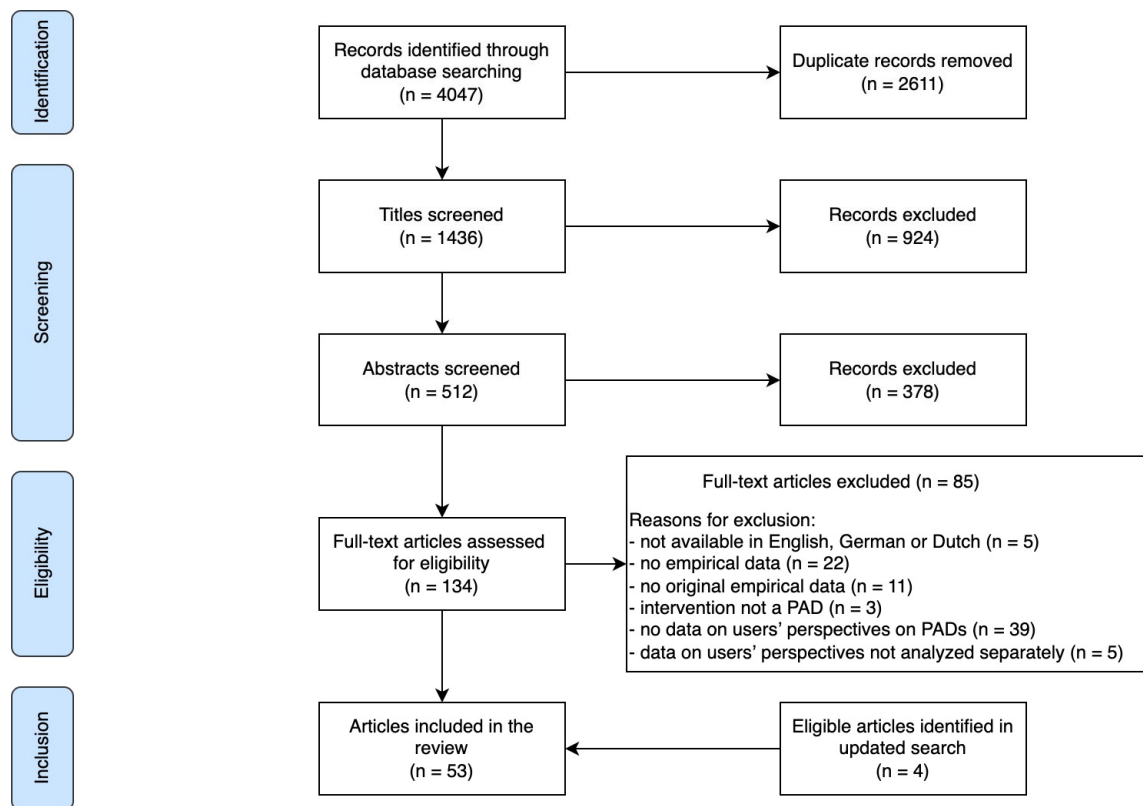

Supplement: appi.ps.202200003.ds001.pdf [file appi.ps.202200003.ds001.pdf]
